# Supplementary material for: Memantine Disrupts Motor Coordination through Anxiety-like Behavior in CD1 Mice
Source: MDPI journal article supplement (doi:10.3390/brainsci12040495), 2022-04-13
Supplement: s1 [file s1]

Archive with 1 entries (1 files):
- brainsci-1668691-supplementary.pdf
